# Supplementary material
Source: publisher figshare collection journal article supplement (https://acs.figshare.com/ndownloader/files/4026721)

# Supporting Information

## **Aggregation-free Gold Nanoparticles in Ordered Mesoporous Carbons: Towards Highly Active and Stable Heterogeneous Catalysts**

*Shuai Wang<sup>†</sup>, Qingfei Zhao<sup>†</sup>, Huimin Wei<sup>†</sup>, Jian-Qiang Wang<sup>‡</sup>, Minhyung Cho<sup>§</sup>, Hae Sung Cho<sup>§</sup>,  
Osamu Terasaki<sup>§</sup>, Ying Wan<sup>\*†</sup>*

<sup>†</sup> The Education Ministry Key Lab of Resource Chemistry, Shanghai Key Laboratory of Rare Earth Functional Materials, and Department of Chemistry, Shanghai Normal University, Shanghai 200234, P. R. China; <sup>‡</sup>Shanghai Synchrotron Radiation Facility (SSRF), Shanghai Institute of Applied Physics, Chinese Academy of Sciences, Shanghai, 201204, P. R. China; <sup>§</sup>Graduate School of EEWS (WCU), Korea Advanced Institute of Science and Technology, Daejeon, 305-701, Republic of Korea

\* To whom correspondence should be addressed. Tel: 86-21-6432-2516; Fax: 86-21-6432-2511;  
E-mail: ywan@shnu.edu.cn

## Preparation of low-polymerized phenolic resins.

8.0 g of phenol was melted at 42 - 45 °C in a flask and mixed with 1.7 g of 20 wt% NaOH aqueous solution under stirring. After 10 min, 14.16 g of formalin (37 wt% formaldehyde) was added. Then the mixture was heated to 70 °C. Upon further stirring for 1 h at this temperature, the mixture was cooled to room temperature. The PH value was adjusted with 2 M HCl solution until it reached a value of ~ 7.0. Subsequently, water was removed by vacuum evaporation below 50 °C.

**SI Table S1.** Oxidation of benzyl alcohol in water using Au based or bimetallic Au-Pd based supported catalysts.

| Catalyst     | Au:substrate<br>/mol: mol | Solvent                    | T<br>/ °C  | P<br>/atm | t<br>/ h | Conv. % | Sel. %<br>(acid) | TON/h <sup>-1</sup><br>(initial<br>rate/total Au<br>concentration) | Ref.         |
|--------------|---------------------------|----------------------------|------------|-----------|----------|---------|------------------|--------------------------------------------------------------------|--------------|
| Au/SBA-15    | 1:400                     | water                      | 80<br>(MW) | ---       | 1        | 100     | 91               | not provided                                                       | 1            |
| Au-Pd/SBA-15 | 1:120 <sup>a</sup>        | decane/<br>water           | 80         | 1         | 8        | 40      | 97<br>(aldehyde) | 12 <sup>a</sup>                                                    | 2            |
| Au60-Pd40/C  | 1:20000                   | cyclo-<br>hexane<br>/water | 60         | 1.5       | 4        | 90      | 98<br>(aldehyde) | 7600 <sup>b</sup>                                                  | 3            |
| Au/PVP       | 1:50                      | water                      | RT         | 1         | 6        | 95      | 91               | not provided                                                       | 4            |
| Au/PoPD      | 1:33.3                    | water                      | RT         | 1         | 24       | 99      | 99               | not provided                                                       | 5            |
| Au/C         | 1:1600                    | water                      | 90         | 10        | 1        | > 99    | > 99             | 4512 <sup>c</sup>                                                  | this<br>work |
| Au/C         | 1:1600                    | water                      | 60         | 1         | 12       | > 99    | > 99             | 384 <sup>d</sup>                                                   | this<br>work |

a: Not provided. Calculated on the basis of the experimental data, and assumed that gold species were completely loaded on the support. Measured after 2 h of reaction.

b: Not provided. Calculated on the basis of the experimental data. Measured after 30 min of reaction.

c: Measured after 10 min of reaction.

d: Measured after 30 min of reaction.

## Reference:

- (1) Liu, Y.; Tsunoyama, H.; Akita, T.; Tsukuda, T. *J. Phys. Chem. C* **2009**, *113*, 13457.
- (2) Ma, C. Y.; Dou, B. J.; Li, J. J.; Cheng, J.; Hu, Q.; Hao, Z. P.; Qiao, S. Z. *Appl. Catal., B* **2009**, *92*, 202.
- (3) Villa, A.; Janjic, N.; Spontoni, P.; Wang, D.; Su, D. S.; Prati, L. *Appl. Catal., A* **2009**, *364*, 221.
- (4) Tsunoyama, H.; Sakurai, H.; Negishi, Y.; Tsukuda, T. *J. Am. Chem. Soc.* **2005**, *127*, 9374.
- (5) Han, J.; Liu, Y.; Guo, R. *Adv. Funct. Mater.* **2009**, *19*, 1112.

**SI Figure S1.** FT-IR spectra for (a) as-made gold-containing mesoporous catalysts synthesized by solvent evaporation induced self-assembly (as-made Au(SH)-SC); (b) the catalyst calcined at 600 °C (Au(SH)-SC); and (c) the Au(SH)-SC catalyst after dissolution of silica (Au(SH)-C).

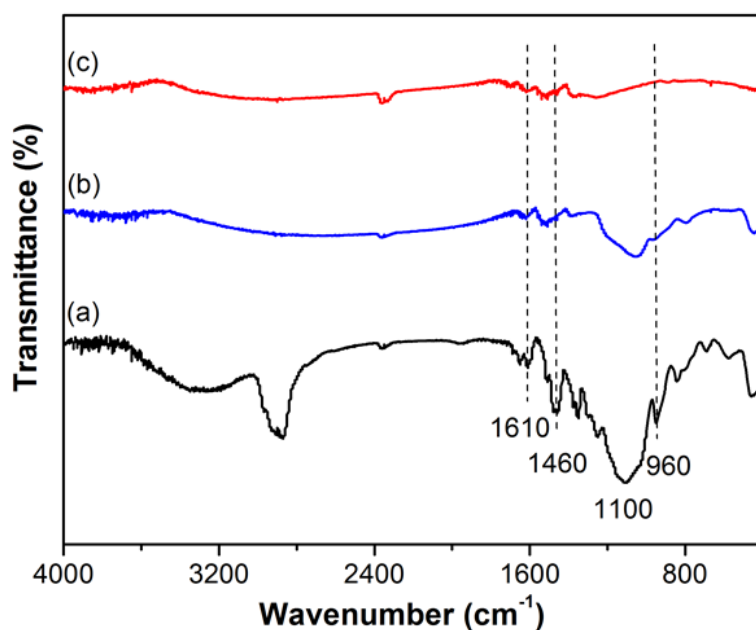

**SI Figure S2.** *t*-plots for (a) Au(SH)-CS and (b) Au(SH)-C.

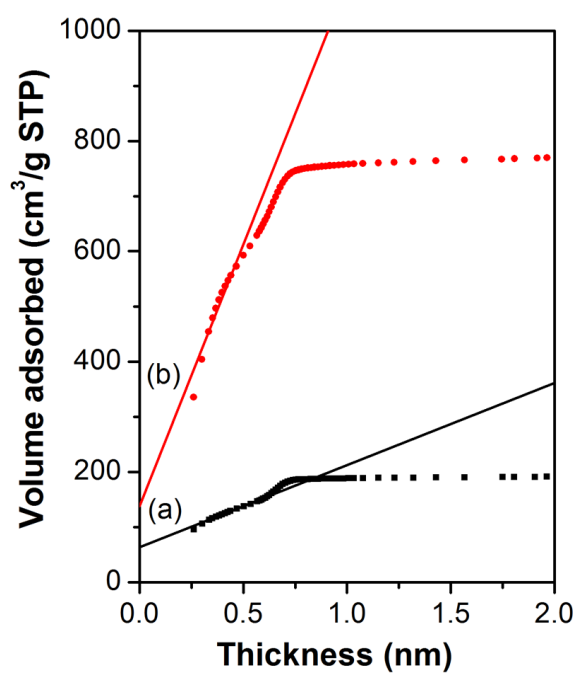

**SI Figure S3.** SAXRD (A) and WAXRD (B) patterns for the thiol-free sample Au(0)-SC.

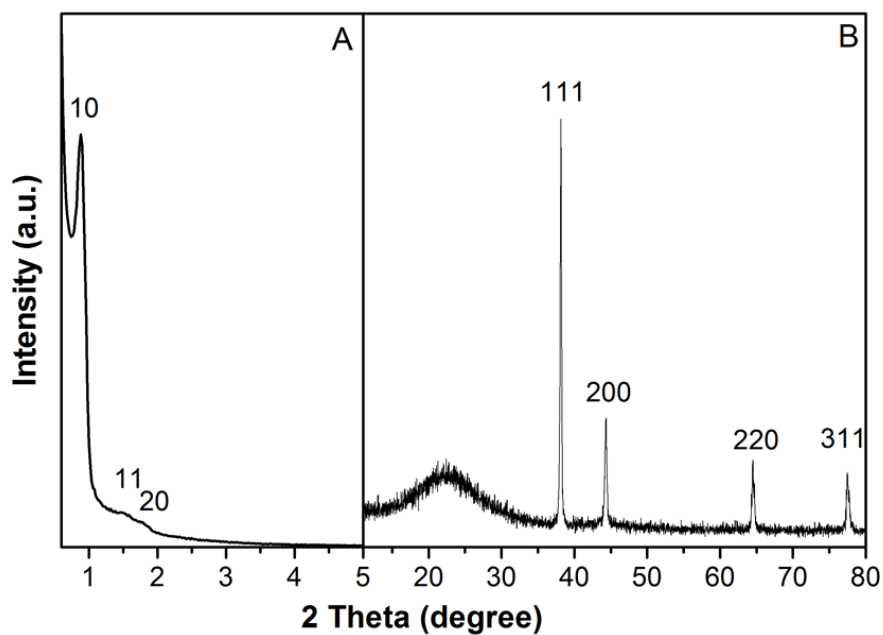

**SI Figure S4.**  $N_2$  sorption isotherms and pore-size distribution curve (inset) for the thiol-free sample Au(0)-SC.

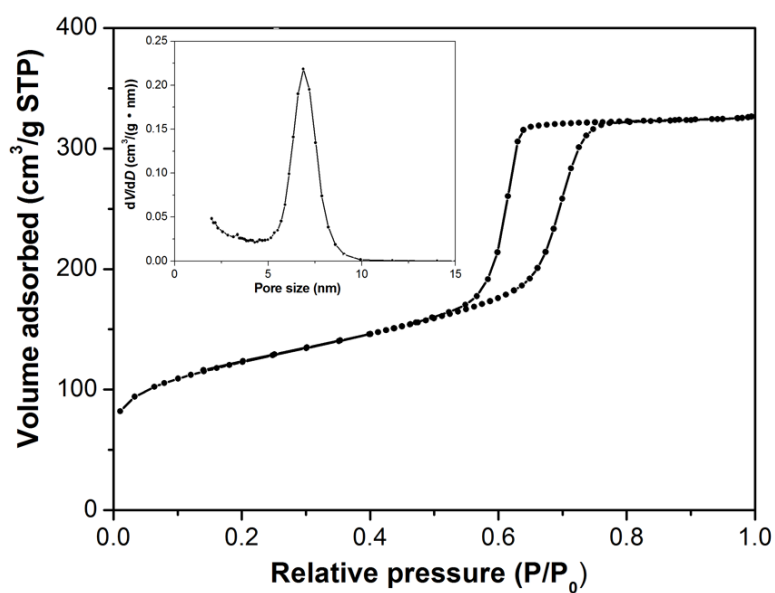

**SI Figure S5.** TEM images for Au(0)-SC heated at 600 °C with low (A) and high (B) magnifications . Inset (B) is EDX pattern.

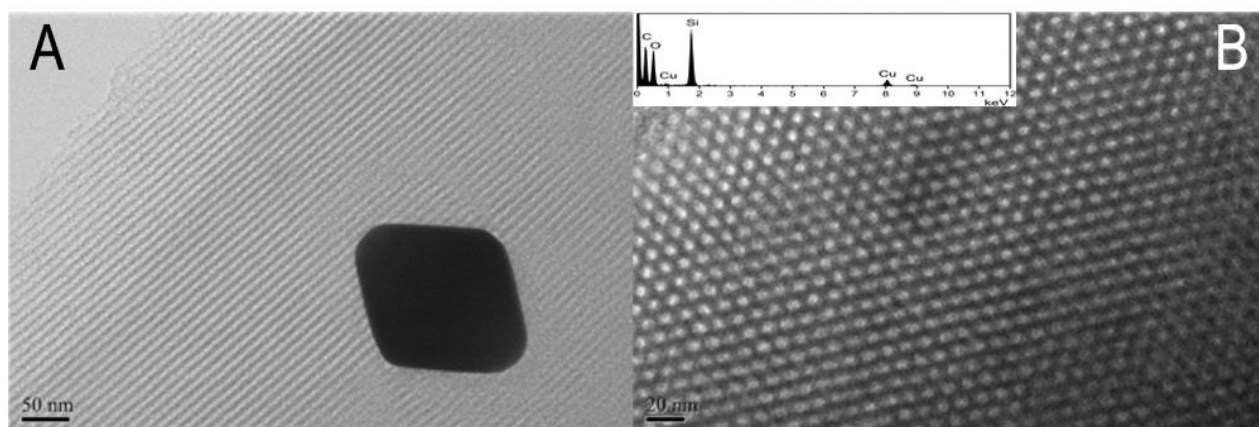

**SI Figure S6.** UV-vis spectra for mono-constituent (A) and bi-constituent (B) synthesis solutions in ethanol.

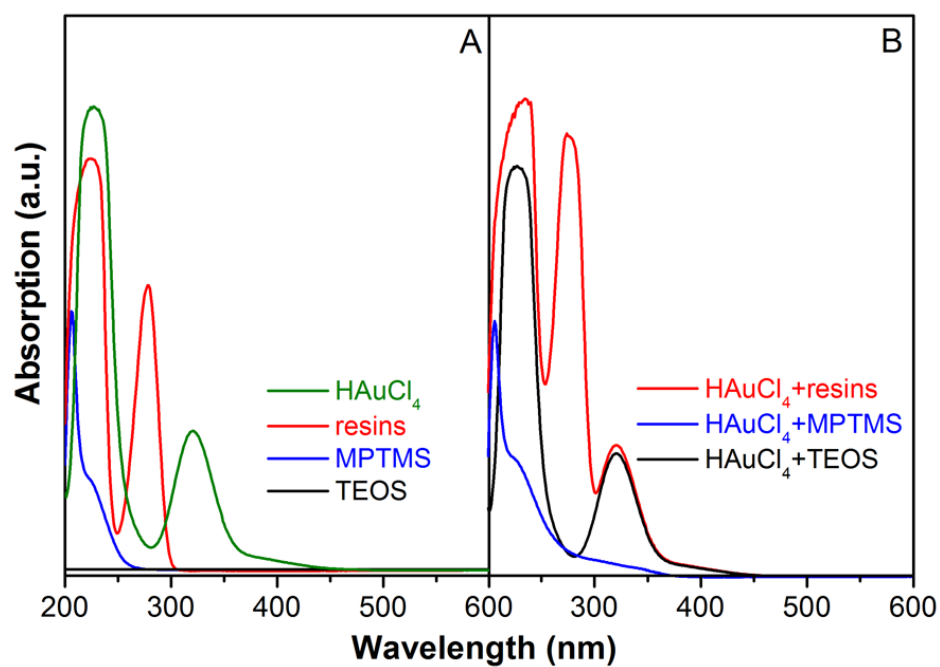

**SI Figure S7.** WAXRD pattern for as-made Au(0)-SC.

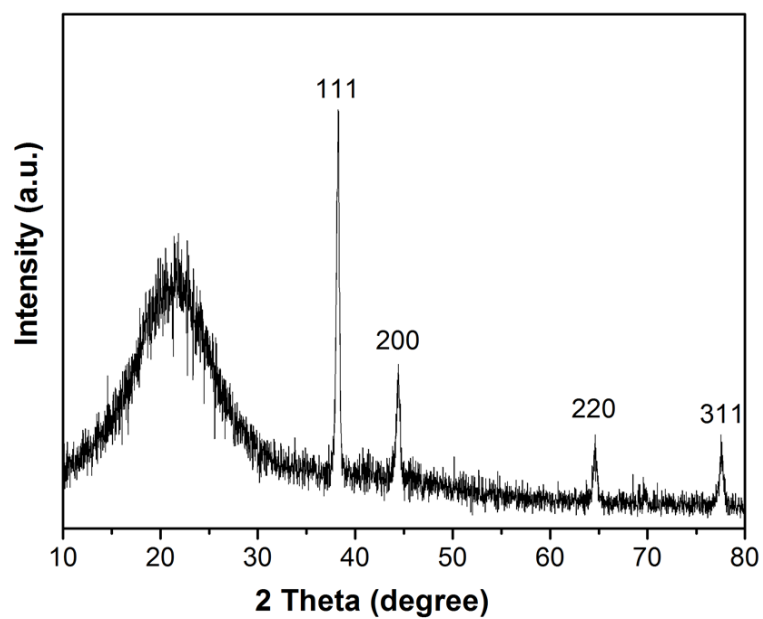

**SI Figure S8.** SAXRD and WAXRD (inset) patterns for the gold-free sample (SH)-C.

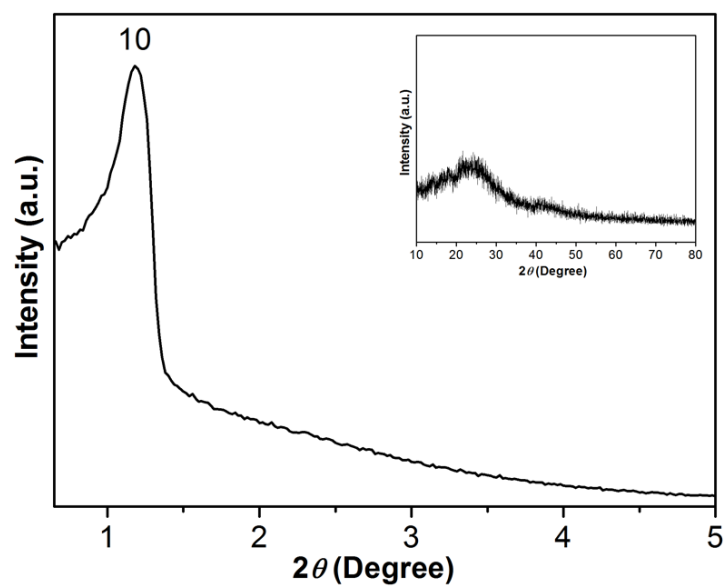

**SI Figure S9.** N<sub>2</sub> sorption isotherms and pore-size distribution curve (inset) for the gold-free sample (SH)-C.

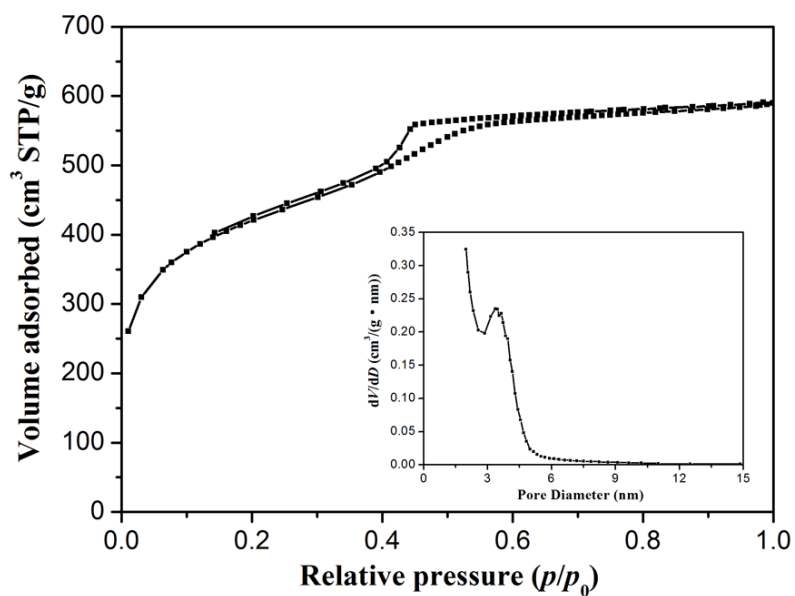

**SI Figure S10.** Time course plots for the conversion of benzyl alcohol (-■-) and yields of benzoic acid (-★-), benzaldehyde (-●-), and benzyl benzoate (-▲-) over the reused catalyst Au(SH)-C-R2.

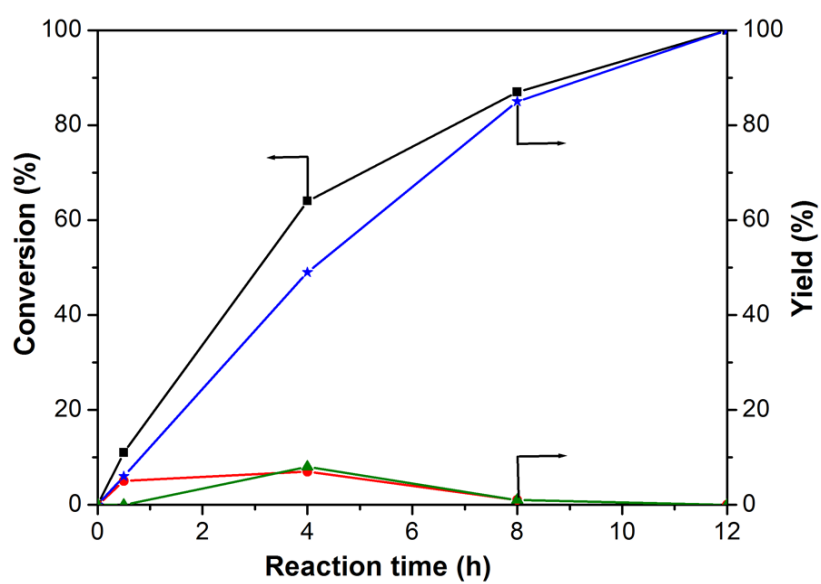

**SI Figure S11.** SAXRD (A) and WAXRD (B) patterns for the (a) fresh Au(SH)-C catalyst, and the catalysts after (b) the first run (Au(SH)-C-R2) and (c) third run (Au(SH)-C-R4).

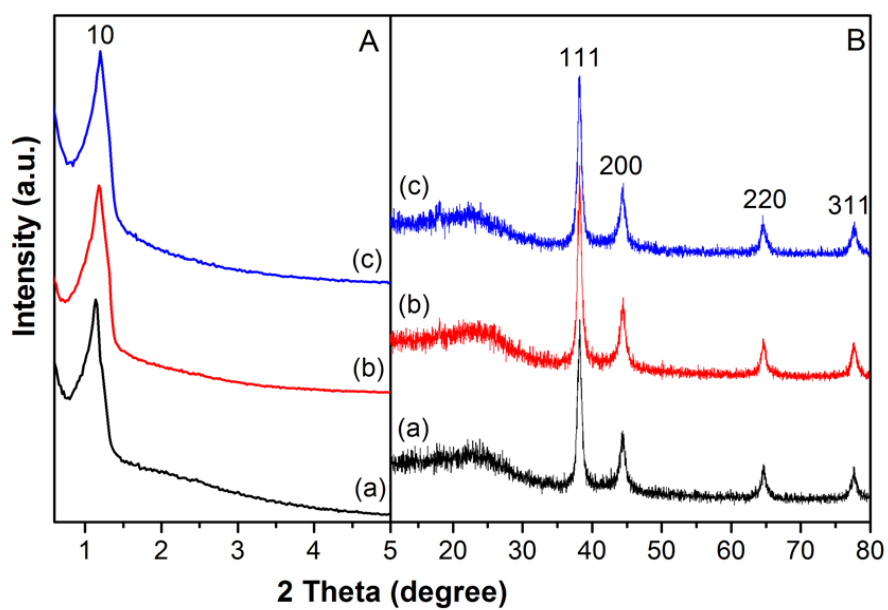

**SI Figure S12.** TEM image for the reused catalyst Au(SH)-C-R2.

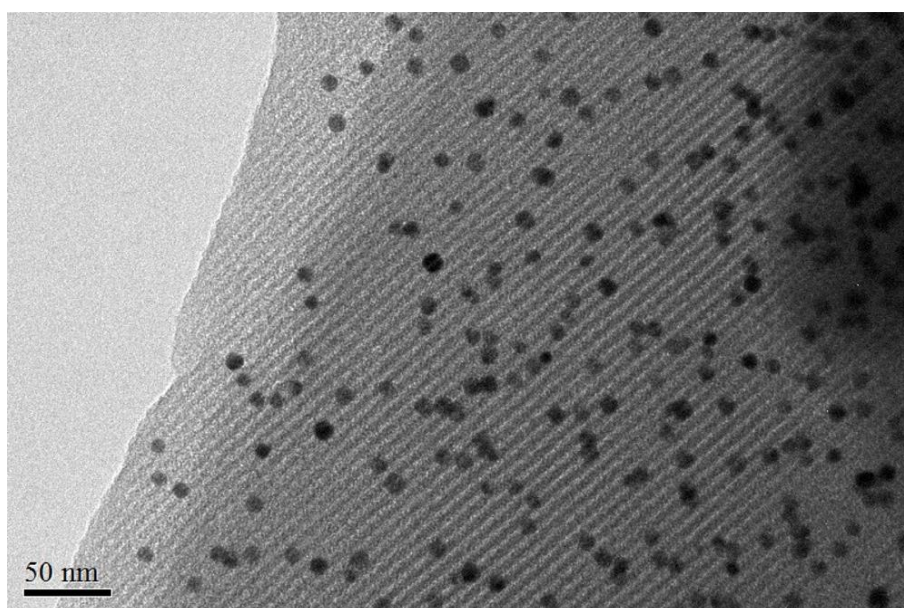



**SI Figure S13.** N<sub>2</sub> sorption isotherms (A) and pore-size distribution curves (B) for the (a) fresh Au(SH)-C-600 catalyst, and the catalysts after (b) the first run (Au(SH)-C-600-R2) and (c) third run (Au(SH)-C-R4).

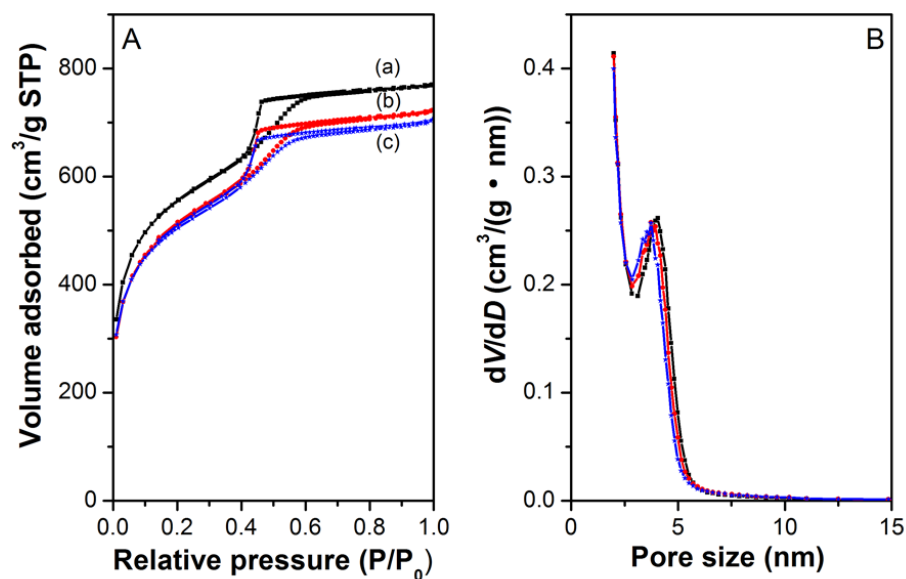

**SI Figure S14.** TEM image (A), and WAXRD pattern (B) for the supported 5.0 nm-gold catalyst.

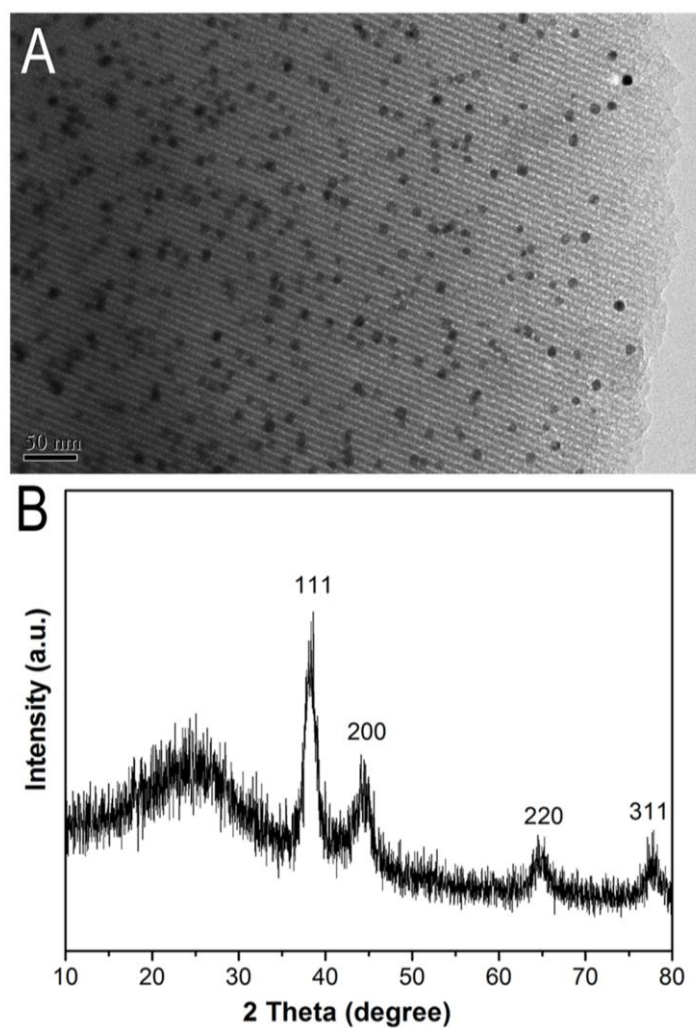

Supplement: Supplementary file 1 [file 4026721]
